# Supplementary material
Source: PubMed Central journal article supplement (PMC10079270)
Supplement: NIHMS1760710-supplement-1.pdf [file NIHMS1760710-supplement-1.pdf]

## **4. Supplemental Information**

### **Contents**

S1. ASCT+B Tables

S2. CCF 3D Reference Object Library

## S1. ASCT+B Tables

Anatomical Structures, Cell Types, plus Biomarkers (ASCT+B) tables aim to capture the structure of anatomical human body parts, the typology of cells, and biomarkers used to identify cell types (e.g., gene and protein). The tables are authored and reviewed by an international team of anatomists, pathologists, physicians, and other experts.

The v1.0 release features a total of 11 tables.

| <b>Table Name</b>                  | <b>DOI</b>                                                                                      |
|------------------------------------|-------------------------------------------------------------------------------------------------|
| 1. Bone Marrow & Blood/Pelvis v1.0 | <a href="https://doi.org/10.48539/HBM963.TBFP.428">https://doi.org/10.48539/HBM963.TBFP.428</a> |
| 2. Brain v1.0                      | <a href="https://doi.org/10.48539/HBM264.CCRF.525">https://doi.org/10.48539/HBM264.CCRF.525</a> |
| 3. Heart v1.0                      | <a href="https://doi.org/10.48539/HBM873.NNVD.559">https://doi.org/10.48539/HBM873.NNVD.559</a> |
| 4. Intestine, Large v1.0           | <a href="https://doi.org/10.48539/HBM287.KVCD.758">https://doi.org/10.48539/HBM287.KVCD.758</a> |
| 5. Kidney v1.0                     | <a href="https://doi.org/10.48539/HBM325.PTQS.258">https://doi.org/10.48539/HBM325.PTQS.258</a> |
| 6. Lung v1.0                       | <a href="https://doi.org/10.48539/HBM868.DWJZ.874">https://doi.org/10.48539/HBM868.DWJZ.874</a> |
| 7. Lymph Node v1.0                 | <a href="https://doi.org/10.48539/HBM375.LMPC.837">https://doi.org/10.48539/HBM375.LMPC.837</a> |
| 8. Skin v1.0                       | <a href="https://doi.org/10.48539/HBM227.WHPG.367">https://doi.org/10.48539/HBM227.WHPG.367</a> |
| 9. Spleen v1.0                     | <a href="https://doi.org/10.48539/HBM625.VPLJ.455">https://doi.org/10.48539/HBM625.VPLJ.455</a> |
| 10. Thymus v1.0                    | <a href="https://doi.org/10.48539/HBM934.JMVN.957">https://doi.org/10.48539/HBM934.JMVN.957</a> |
| 11. Vasculature v1.0               | <a href="https://doi.org/10.48539/HBM426.GZPN.888">https://doi.org/10.48539/HBM426.GZPN.888</a> |

## S2. CCF 3D Reference Object Library

The CCF 3D Reference Object Library comprises anatomically correct reference organs. The organs are developed by specialists in 3D medical illustration and approved by organ experts.

The v1.0 release features a total of 26 reference organs.

The crosswalk table to the ASCT+B tables is available via the CCF 3D Reference Object Library page at <https://hubmapconsortium.github.io/ccf/pages/ccf-3d-reference-library.html>.

| <b>3D Reference Organ Name</b>     | <b>DOI</b>                                                                                      |
|------------------------------------|-------------------------------------------------------------------------------------------------|
| 1. Pelvis, Male v1.0               | <a href="https://doi.org/10.48539/HBM672.KSST.448">https://doi.org/10.48539/HBM672.KSST.448</a> |
| 2. Pelvis, Female v1.0             | <a href="https://doi.org/10.48539/HBM539.RRDB.894">https://doi.org/10.48539/HBM539.RRDB.894</a> |
| 3. Brain, Male v1.0                | <a href="https://doi.org/10.48539/HBM927.XKJR.426">https://doi.org/10.48539/HBM927.XKJR.426</a> |
| 4. Brain, Female v1.0              | <a href="https://doi.org/10.48539/HBM438.XKJT.666">https://doi.org/10.48539/HBM438.XKJT.666</a> |
| 5. Heart, Male v1.0                | <a href="https://doi.org/10.48539/HBM384.FDPD.646">https://doi.org/10.48539/HBM384.FDPD.646</a> |
| 6. Heart, Female v1.0              | <a href="https://doi.org/10.48539/HBM894.FGQN.237">https://doi.org/10.48539/HBM894.FGQN.237</a> |
| 7. Intestine, Large, Male v1.0     | <a href="https://doi.org/10.48539/HBM235.QFTP.824">https://doi.org/10.48539/HBM235.QFTP.824</a> |
| 8. Intestine, Large, Female v1.0   | <a href="https://doi.org/10.48539/HBM734.KXRL.243">https://doi.org/10.48539/HBM734.KXRL.243</a> |
| 9. Kidney, Male, Left v1.0         | <a href="https://doi.org/10.48539/HBM792.NPXX.335">https://doi.org/10.48539/HBM792.NPXX.335</a> |
| 10. Kidney, Male, Right v1.0       | <a href="https://doi.org/10.48539/HBM693.RTRN.866">https://doi.org/10.48539/HBM693.RTRN.866</a> |
| 11. Kidney, Female, Left v1.0      | <a href="https://doi.org/10.48539/HBM765.JWFB.892">https://doi.org/10.48539/HBM765.JWFB.892</a> |
| 12. Kidney, Female, Right v1.0     | <a href="https://doi.org/10.48539/HBM726.HWKT.534">https://doi.org/10.48539/HBM726.HWKT.534</a> |
| 13. Lung, Male v1.0                | <a href="https://doi.org/10.48539/HBM373.VPSC.692">https://doi.org/10.48539/HBM373.VPSC.692</a> |
| 14. Lung, Female v1.0              | <a href="https://doi.org/10.48539/HBM467.NHKR.974">https://doi.org/10.48539/HBM467.NHKR.974</a> |
| 15. Lymph Node, Male, Left v1.0    | <a href="https://doi.org/10.48539/HBM668.RBLW.256">https://doi.org/10.48539/HBM668.RBLW.256</a> |
| 16. Lymph Node, Male, Right v1.0   | <a href="https://doi.org/10.48539/HBM699.BLKS.298">https://doi.org/10.48539/HBM699.BLKS.298</a> |
| 17. Lymph Node, Female, Left v1.0  | <a href="https://doi.org/10.48539/HBM897.HVMV.989">https://doi.org/10.48539/HBM897.HVMV.989</a> |
| 18. Lymph Node, Female, Right v1.0 | <a href="https://doi.org/10.48539/HBM439.ZTGH.778">https://doi.org/10.48539/HBM439.ZTGH.778</a> |
| 19. Skin, Male v1.0                | <a href="https://doi.org/10.48539/HBM689.CGPV.442">https://doi.org/10.48539/HBM689.CGPV.442</a> |
| 20. Skin, Female v1.0              | <a href="https://doi.org/10.48539/HBM287.TJZD.872">https://doi.org/10.48539/HBM287.TJZD.872</a> |
| 21. Spleen, Male v1.0              | <a href="https://doi.org/10.48539/HBM583.DRHV.265">https://doi.org/10.48539/HBM583.DRHV.265</a> |
| 22. Spleen, Female v1.0            | <a href="https://doi.org/10.48539/HBM626.WZGS.532">https://doi.org/10.48539/HBM626.WZGS.532</a> |
| 23. Thymus, Male v1.0              | <a href="https://doi.org/10.48539/HBM955.BGTP.947">https://doi.org/10.48539/HBM955.BGTP.947</a> |
| 24. Thymus, Female v1.0            | <a href="https://doi.org/10.48539/HBM896.TWPT.542">https://doi.org/10.48539/HBM896.TWPT.542</a> |
| 25. Vasculature, Male v1.0         | <a href="https://doi.org/10.48539/HBM784.ZDZF.357">https://doi.org/10.48539/HBM784.ZDZF.357</a> |
| 26. Vasculature, Female v1.0       | <a href="https://doi.org/10.48539/HBM253.DKWB.737">https://doi.org/10.48539/HBM253.DKWB.737</a> |
